# Supplementary material for: Hydrogen storage on volleyballene
Source: Royal Society of Chemistry journal article supplement (doi:10.1039/c8cp01987h), 2018-01-01
Supplement: c8cp01987h1.pdf [file c8cp01987h1.pdf]

## SUPPORTING INFORMATION

### Hydrogen Storage on Volleyballene

A. Tlahuice-Flores<sup>a\*</sup>

Universidad Autónoma de Nuevo León, CICFIM-Facultad de Ciencias Físico-Matemáticas, San Nicolás de los Garza, NL 66450, México

Email: [tlahuicef@gmail.com](mailto:tlahuicef@gmail.com)

**Table S1.** Calculated tilt angles among pentagonal rings and triangular faces of the hydrogenated volleyballene.

**Figure S1.** Comparison between ORCA and G03 calculations of IR/Raman spectra of volleyballene.

**Figure S2.** Comparison of IR/Raman spectra of volleyballene and hydrogenated volleyballene.

**Table S1.** Calculated tilt angles between pentagonal rings and triangular faces of icosahedron like  $Sc_{12}$  cluster.

| Indexes | angle (degrees) |
|---------|-----------------|
| 1       | 22.35           |
| 2       | 25.27           |
| 3       | 27.22           |
| 4       | 33.35           |
| 5       | 35.85           |
| 6       | 40.33           |
| 7       | 41.97           |
| 8       | 42.21           |
| 9       | 43.95           |
| 10      | 45.28           |
| 11      | 48.14           |
| 12      | 57.37           |

Note: The obtained difference among tilt angles is a consequence of the  $C_1$  symmetry displayed by the hydrogenated volleyballene.

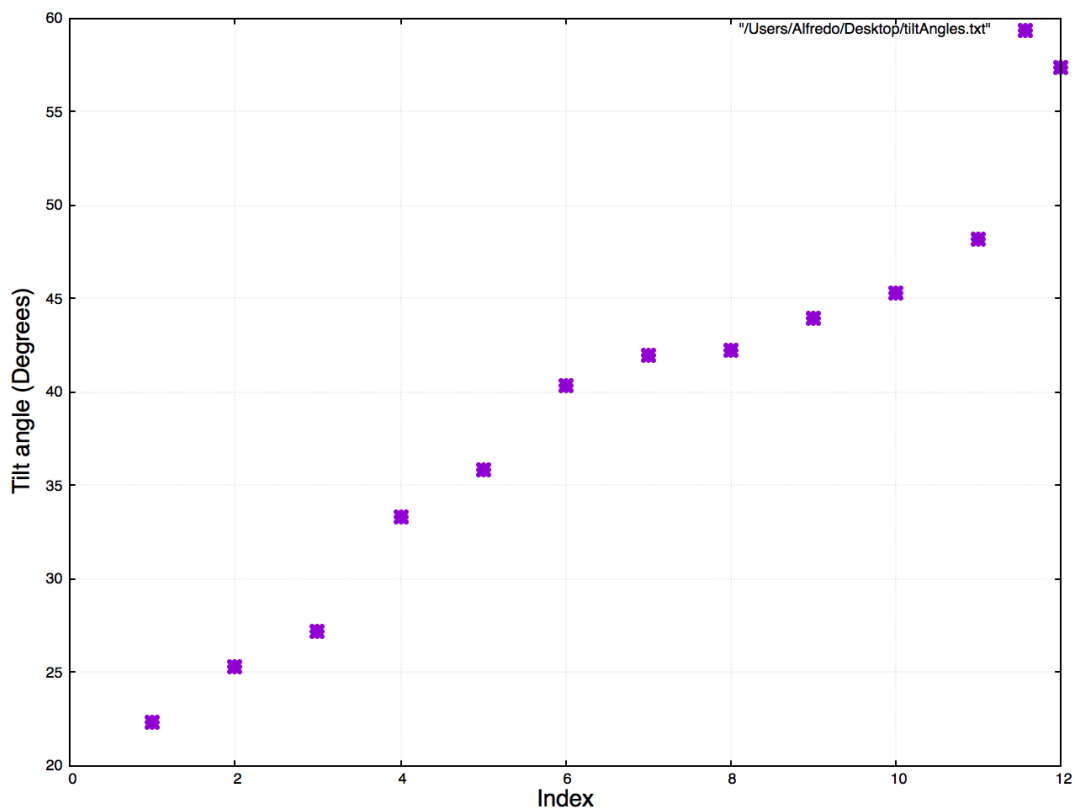

**Figure S1.** Comparison between ORCA/G03 calculations of IR/Raman spectra of V-ball. Both calculations are in agreement with Ref. 2.

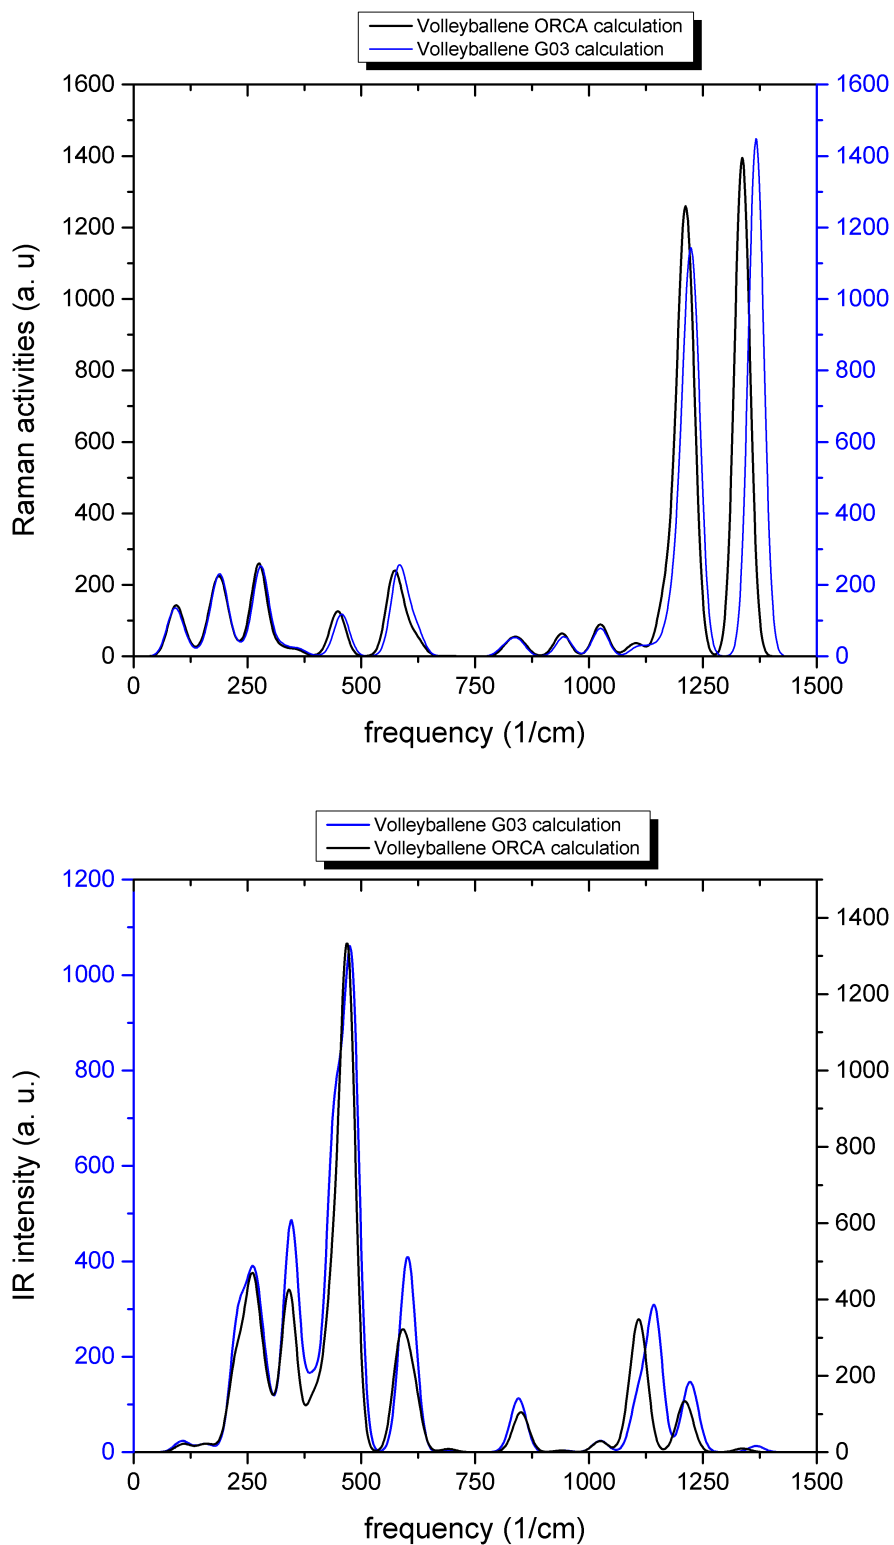

Blue profiles correspond with the G03 calculations in ref. 2. A gaussian broadening of  $20 \text{ cm}^{-1}$  was used.

**Figure S2.** Comparison of calculated Raman (upper panel) and IR (lower panel) spectra of V-ball and heavy hydrogenated volleyballene ( $\text{Sc}_{20}\text{C}_{60}\text{H}_{70}$ ) by means of DFT calculations (ORCA package). A gaussian broadening of  $20\text{ cm}^{-1}$  was used.

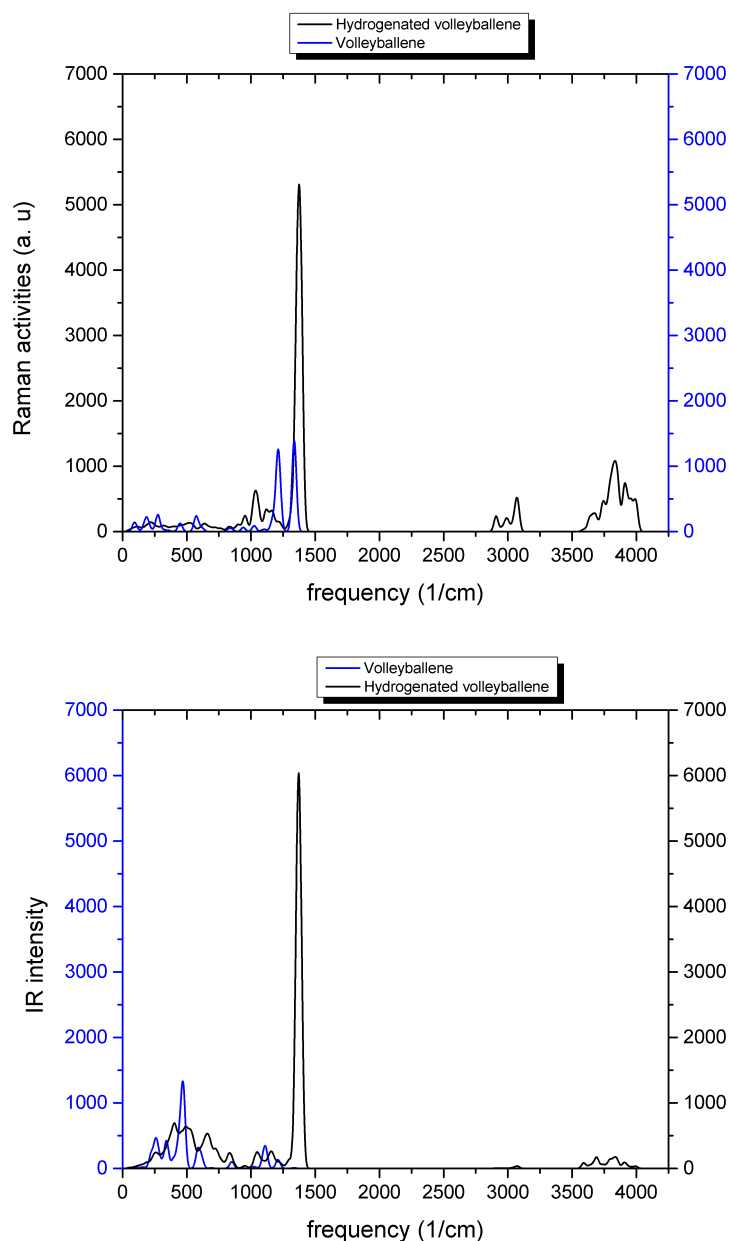

Raman spectra (upper panel) show a slight shift toward large frequencies for hydrogenated volleyballene with an intense and characteristic peak located circa  $1391\text{ cm}^{-1}$ . IR spectra (lower panel) features an intense peak located circa  $1382\text{ cm}^{-1}$  for hydrogenated volleyballene which can be attributed to Sc-H stretching vibration. Both IR and Raman spectra feature more intense peaks in the case of hydrogenated volleyballene. Characteristic peaks after  $2700\text{ cm}^{-1}$  are displayed by the hydrogenated structure.
